# Supplementary material for: Population genomics of an exceptional hybridogenetic system of Pelophylax water frogs
Source: PubMed Central journal article supplement (PMC6683362; doi:10.1186/s12862-019-1482-4), 2019-08-05
Supplement: 12862_2019_1482_MOESM1_ESM.pdf [file 12862_2019_1482_MOESM1_ESM.pdf]

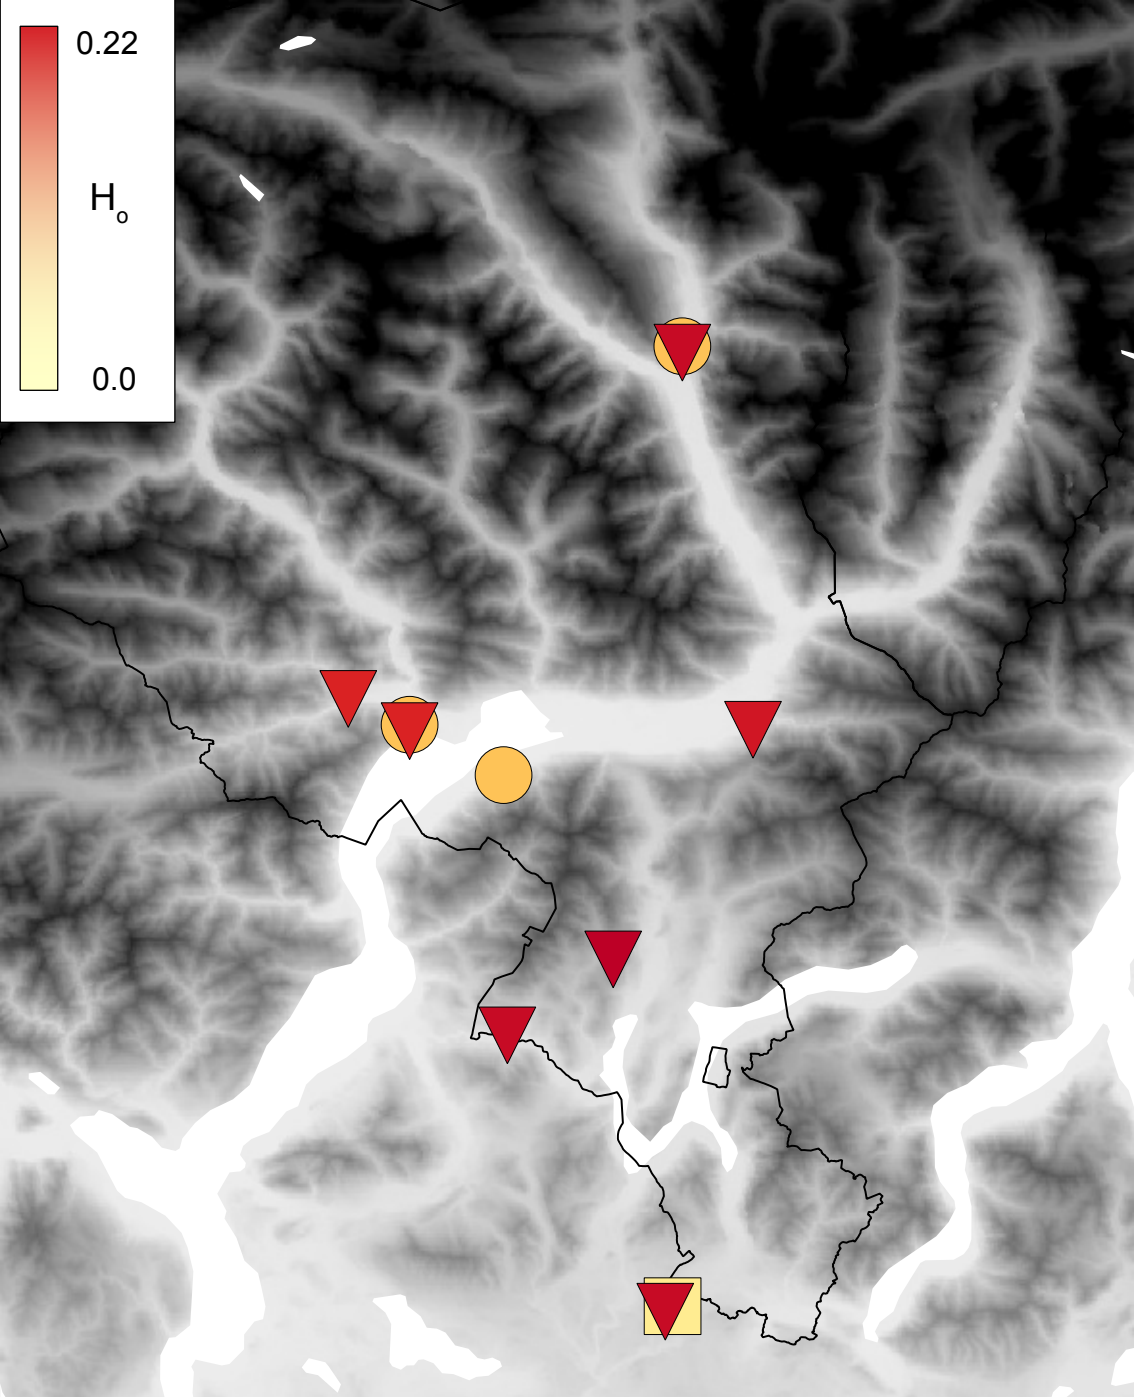

**Fig. S1:** Average heterozygosity of *Pelophylax* populations from Ticino, based on 2,521 SNPs. Circles: *P. lessonae*; triangles: *P. kl. esculentus*; square: *P. ridibundus*
